# Supplementary material for: Identification of Novel Therapeutic Targets for Polyglutamine Diseases That Target Mitochondrial Fragmentation
Source: Int J Mol Sci. 2021 Dec 14;22(24):13447. doi: 10.3390/ijms222413447 (PMC8703635; doi:10.3390/ijms222413447)
Supplement: Supplementary file 1 [file ijms-22-13447-s001.zip › ijms-1459979-supplementary.pdf]

Supplementary Information for:

## **Identification of novel therapeutic targets for polyglutamine diseases that target mitochondrial fragmentation**

Annika Traa<sup>1,2\*</sup>, Emily Machiela<sup>3\*</sup>, Paige D. Rudich<sup>1,2</sup>, Sonja K. Soo<sup>1,2</sup>, Megan M. Senchuk<sup>3</sup>,  
Jeremy M. Van Raamsdonk<sup>1,2,3,4,5</sup>

<sup>1</sup>Department of Neurology and Neurosurgery, McGill University, Montreal, Quebec, H4A 3J1, Canada

<sup>2</sup>Metabolic Disorders and Complications Program, and Brain Repair and Integrative Neuroscience Program, Research Institute of the McGill University Health Centre, Montreal, Quebec, H4A 3J1, Canada

<sup>3</sup>Laboratory of Aging and Neurodegenerative Disease, Center for Neurodegenerative Science, Van Andel Research Institute, Grand Rapids MI 49503, USA

<sup>4</sup>Division of Experimental Medicine, Department of Medicine, McGill University, Montreal, Quebec, Canada

<sup>5</sup>Department of Genetics, Harvard Medical School, Boston MA 02115, USA

\*these authors contributed equally to this work

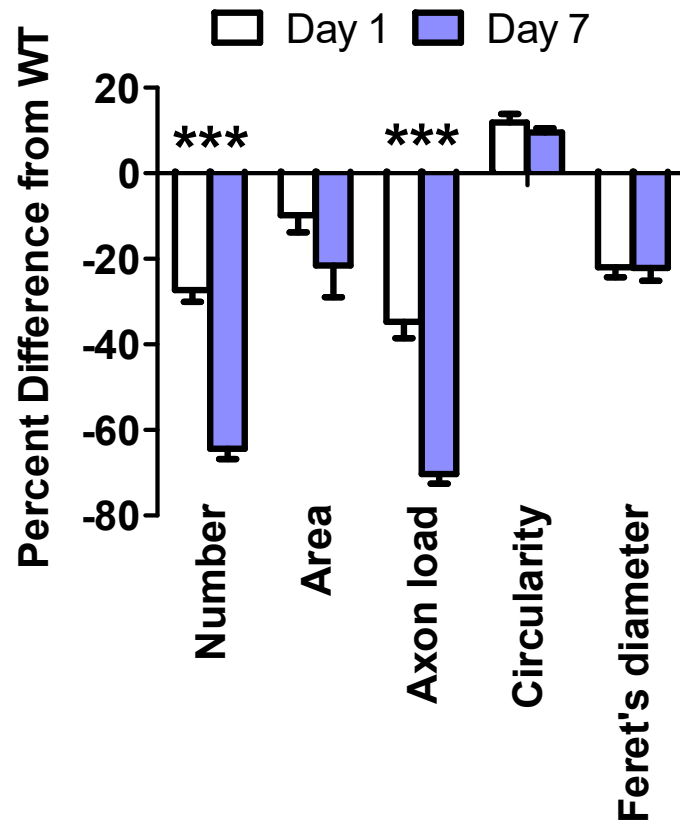

**Figure S1. Differences in mitochondrial morphology in neuronal model of polyglutamine toxicity worsen with age.** This figure compares the percentage change in measurements of mitochondrial morphology in Neur-67Q worms relative to wild-type worms at day 1 and day 7 of adulthood (data from **Figure 1**). The decrease in mitochondrial number and axonal mitochondrial load exhibited significantly greater deficit at day 7 of adulthood compared to day 1 of adulthood. Statistical significance was assessed using a two-way ANOVA with Bonferroni's multiple comparison test. Error bar indicate SEM. \*\*\*p<0.001.

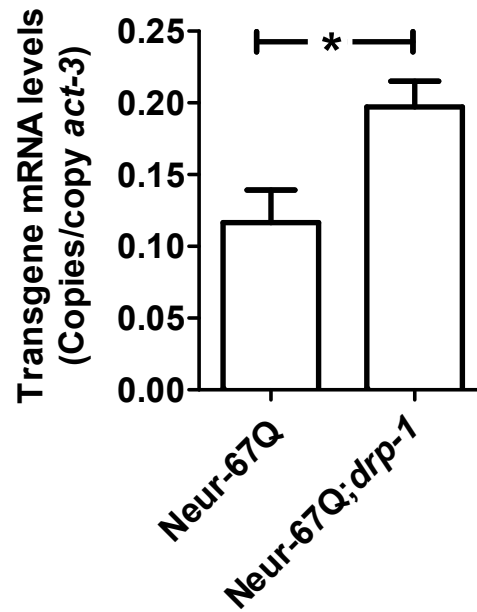

**Figure S2. Deletion of *drp-1* results in increased expression of the polyglutamine transgene.** mRNA was isolated from day 1 pre-fertile young adult worms. Primers were designed to target YFP. In Neur-67Q worms, deletion of *drp-1* significantly increased mRNA expression levels of the polyglutamine transgene. Bars indicate mean value of three biological replicates. Statistical significance was assessed using a t-test. Error bars indicate SEM. \* $p < 0.05$ .

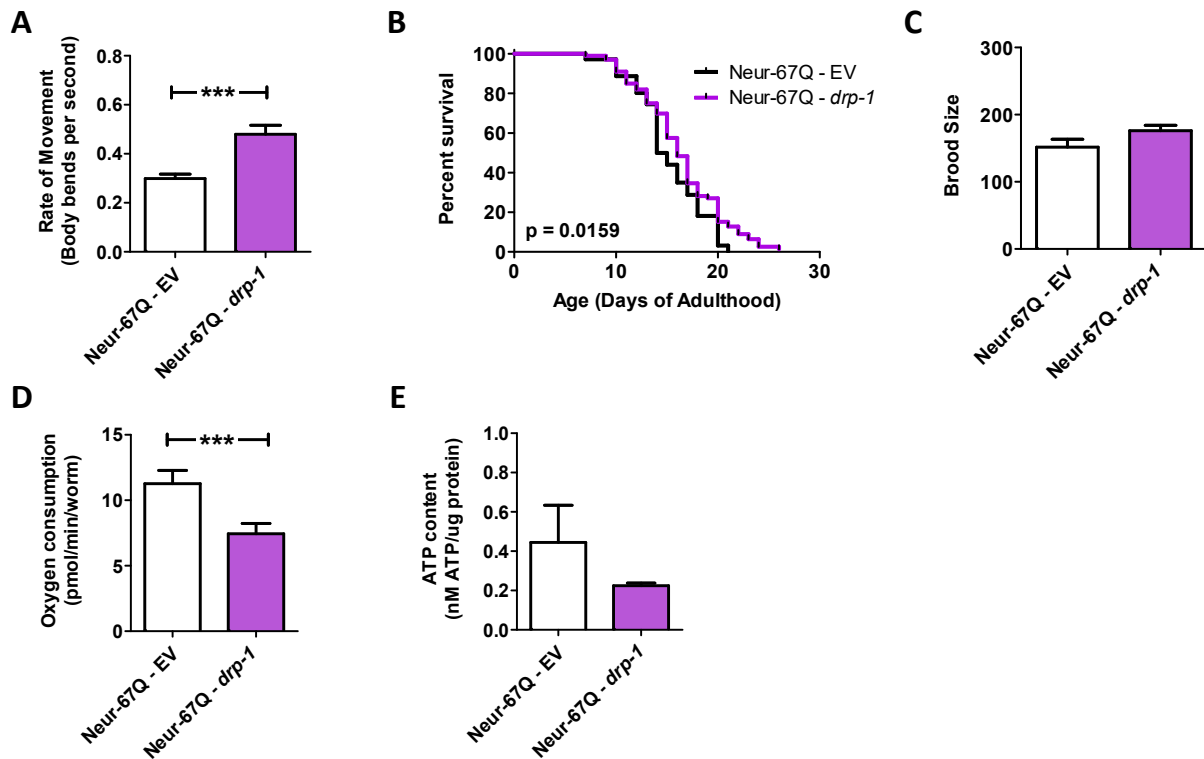

**Figure S3. Decreasing mitochondrial fission through *drp-1* RNAi increases movement and lifespan in neuronal models of polyglutamine toxicity.** Neur-67Q worms were crossed to *sid-1;unc-119p::sid-1* worms to allow for RNAi only in neurons. *drp-1* RNAi increases movement rates in Neur-67Q worms (**A**) and results in a small but significant increase in lifespan in Neur-67Q worms (**B**). *drp-1* RNAi has no effect on fertility in Neur-67Q worms (**C**). *drp-1* RNAi significantly reduced oxygen consumption in Neur-67Q worms (**D**) and resulted in a trend towards decreased ATP levels (**E**). A minimum of three biological replicates were performed. Bars indicate the mean value. Significance was assessed using a t-test (A,C,D,E) or log-rank test (B). Error bars indicate SEM. \*\*\* $p < 0.001$ .

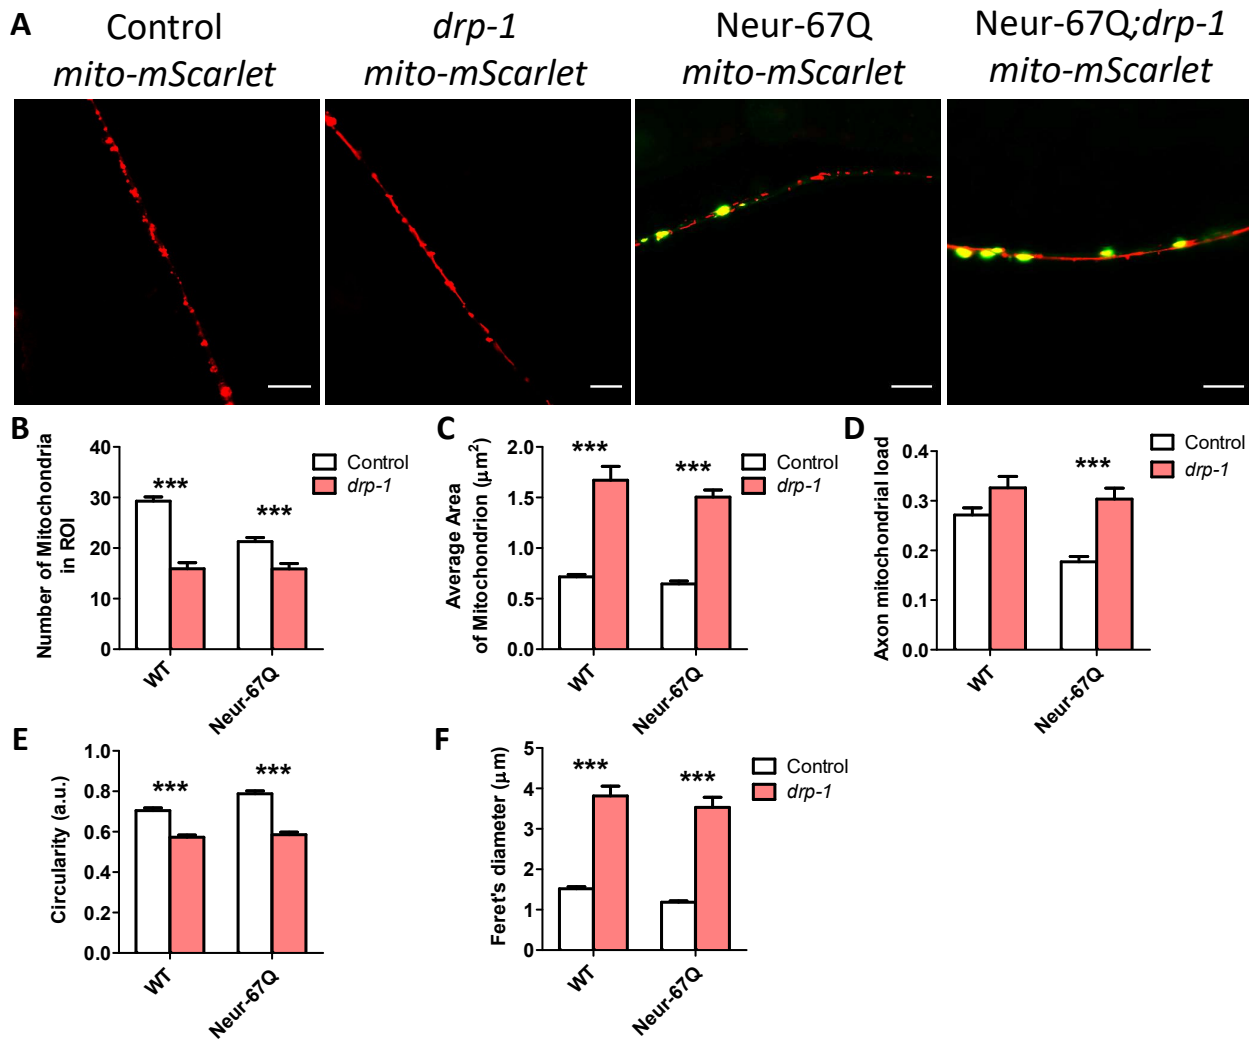

**Figure S4. Disruption of *drp-1* markedly elongates mitochondria in neurons.** Deletion of *drp-1* decreased mitochondrial fragmentation in Neur-67Q and control worms. Representative images of Neur-67Q worms and control worms in wild-type and *drp-1* deletion background (**A**). Scale bar indicates 10  $\mu\text{m}$ . Quantification of mitochondrial morphology revealed that *drp-1* deletion significantly decreased mitochondrial number (**B**), increased mitochondrial area (**C**), increased axonal mitochondrial load (**D**), decreased mitochondrial circularity (**E**), and increased the Feret's diameter of the mitochondria (**F**) in both Neur-67Q and control worms. Control worms are *rab-3p::tomm-20::mScarlet*. For panels B-F, "Control" refers to worms in a wild-type background with normal expression of *drp-1* (either wild-type or Neur-67Q worms). Control data is from Figure 1 and is shown to facilitate direct comparison of the effects of *drp-1* deletion. Three biological replicates were performed. Statistical significance was assessed using a two-way ANOVA with Bonferroni posttest. Error bars indicate SEM. \*\* $p < 0.01$ , \*\*\* $p < 0.001$ .

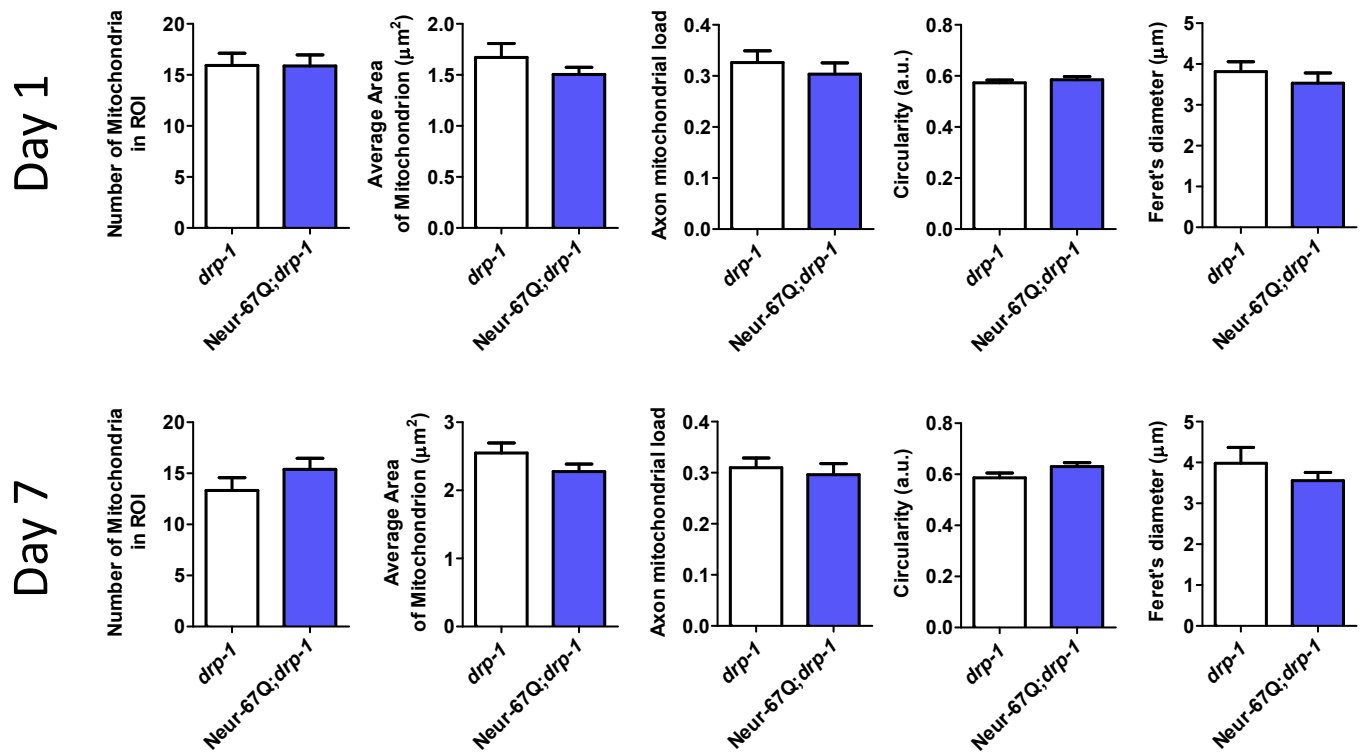

**Figure S5. Expression of disease-length polyglutamine in neurons does not affect mitochondrial morphology in *drp-1* mutant background.** This figure is displaying the data from **Figure 4** and **Figure S4** in such a way to directly compare *drp-1* worms to Neur-67Q;*drp-1* worms. There were no significant differences in any measure of mitochondrial morphology between *drp-1* and Neur-67Q;*drp-1* worms at day 1 (top) or day 7 (bottom) of adulthood. Thus, disruption of *drp-1* completely eliminates differences in mitochondrial morphology between Neur-67Q and wild-type worms. Three biological replicates were performed. Statistical significance was assessed using a t-test. Error bars indicate SEM.

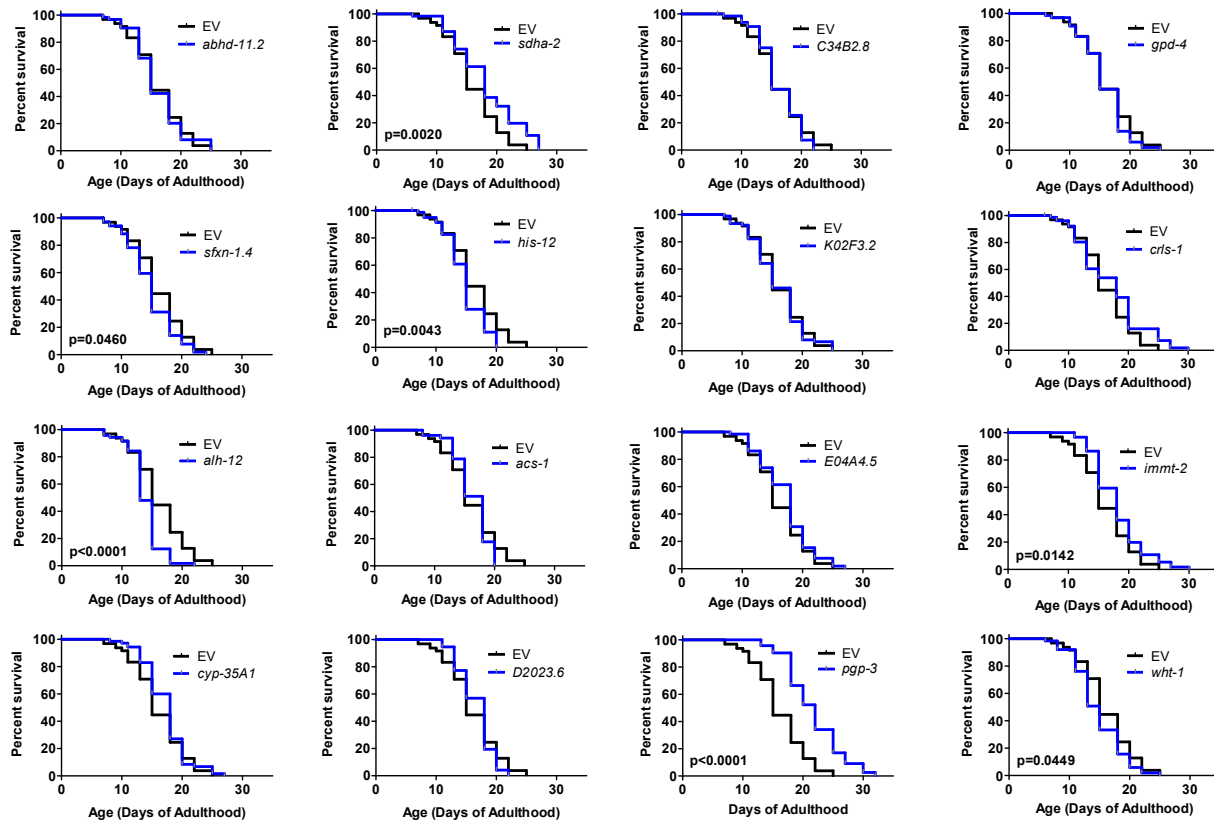

**Figure S6. Neuron-specific knockdown of *sdha-2*, *immt-2* and *pgp-3* extends lifespan in a wild-type background.** *unc-119p::sid-1;sid-1* control worms were treated with RNAi clones that decrease mitochondrial fragmentation and improved movement in Neur-67Q worms. Only three of the sixteen RNAi clones that improved movement in Neur-67Q worms resulted in increased lifespan in control worms. Three biological replicates were performed. Log-rank test was used to assess significance.

**Table S1. Comparison of neuronal and body wall muscle models of polyglutamine toxicity.** Data from BW-Htt74Q worms is from Machiela *et al.* 2021, *Aging and Disease*, PMID: 34631219).

|                                        | Wild-type | Neur-67Q model | BW-Htt74Q model  |
|----------------------------------------|-----------|----------------|------------------|
| Promoter                               |           | <i>rgef-1</i>  | <i>unc-54</i>    |
| Huntingtin sequence                    |           | None           | Exon 1           |
| Glutamines                             |           | 67             | 74               |
| Fluorescent tag                        |           | YFP            | GFP              |
| Expression                             |           | All neurons    | Body wall muscle |
| Mitochondrial number                   |           | Decreased      | Increased        |
| Mitochondrial area                     |           | Unchanged      | Decreased        |
| Mitochondria circularity               |           | Increased      | Increased        |
| Oxygen consumption                     |           | Increased      | Unchanged        |
| ATP levels                             |           | Decreased      | Unchanged        |
| Movement                               |           | Decreased      | Decreased        |
| Lifespan                               |           | Decreased      | Decreased        |
| Brood size                             |           | Decreased      | Decreased        |
| Development time                       |           | Increased      | Unchanged        |
|                                        |           |                |                  |
| <u>Effect of <i>drp-1</i> deletion</u> |           |                |                  |
| Mitochondrial morphology               | Elongated | Elongated      | Unchanged        |
| Oxygen consumption                     | Unchanged | Decreased      | Unchanged        |
| ATP levels                             | Decreased | Decreased      | Decreased        |
| Movement                               | Unchanged | Increased      | Decreased        |
| Lifespan                               | Unchanged | Increased      | Decreased        |
| Brood size                             | Decreased | Unchanged      | Decreased        |
| Development time                       | Increased | Unchanged      | Increased        |
|                                        |           |                |                  |
| <u>Effect of <i>drp-1</i> RNAi</u>     |           |                |                  |
| Oxygen consumption                     | Unchanged | Decreased      | Unchanged        |
| ATP levels                             | Decreased | Decreased      | Decreased        |
| Movement                               | Increased | Increased      | Unchanged        |
| Lifespan                               | Unchanged | Increased      | Increased        |
| Brood size                             | Decreased | Unchanged      | Decreased        |
